# Supplementary figures and images for: Nanostructured carbon materials based electrothermal air pump actuators
Source: Royal Society of Chemistry journal article supplement (doi:10.1039/c4nr00536h), 2014-01-01

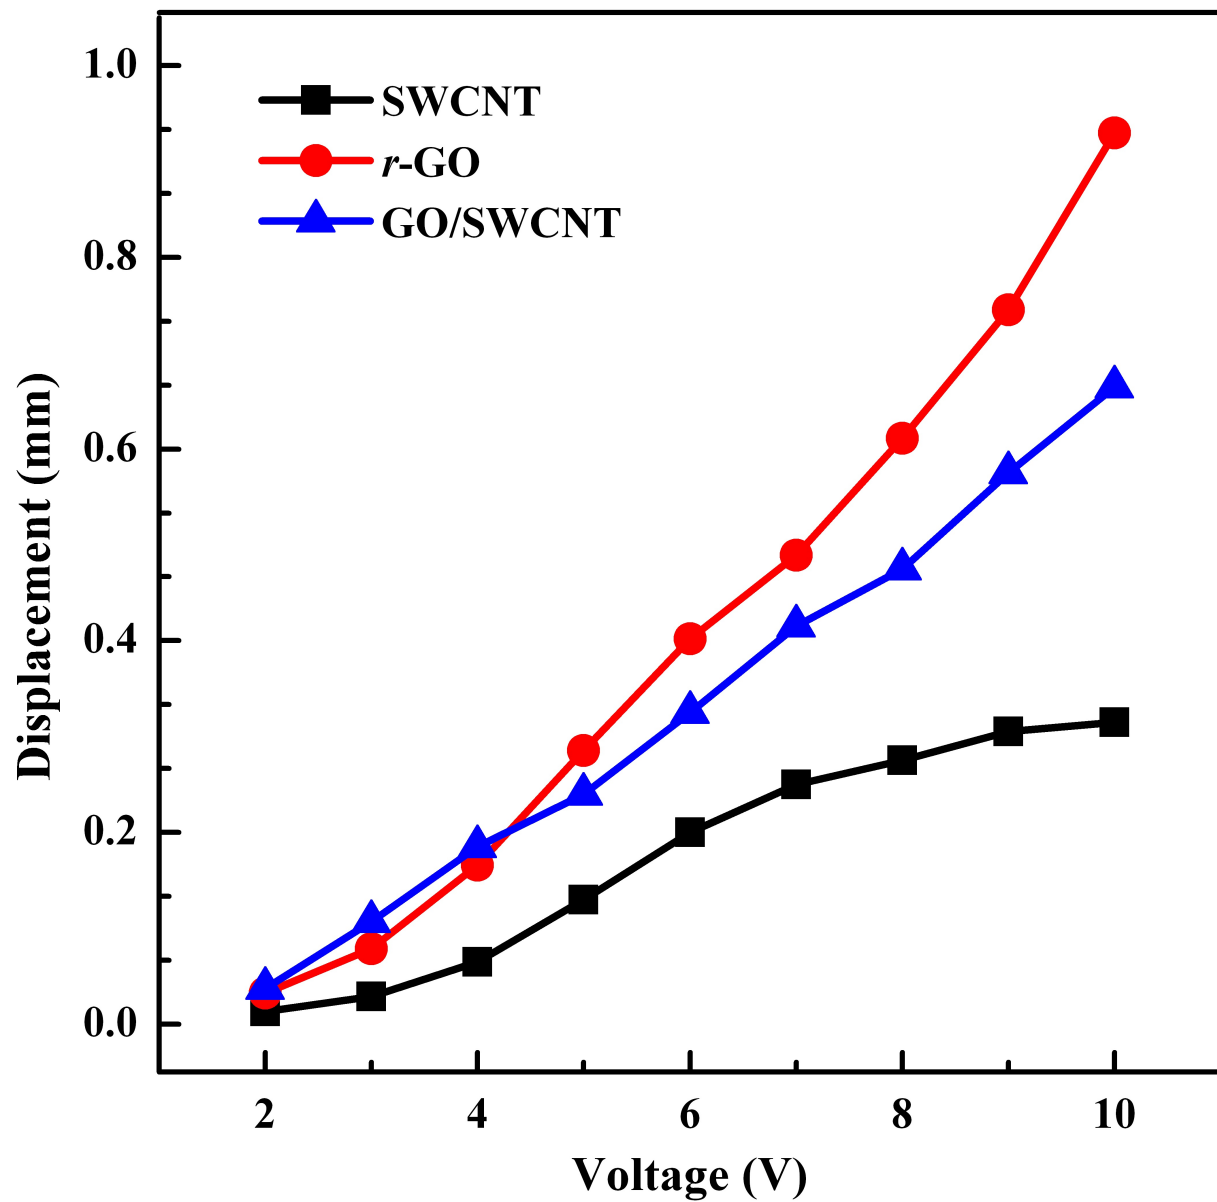

Supplement: c4nr00536h1.pdf [file c4nr00536h1.pdf]
